# Supplementary material for: Effect of an artificial intelligence-assisted tool on non-valvular atrial fibrillation anticoagulation management in primary care: protocol for a cluster randomized controlled trial
Source: Springer Nature journal article supplement (doi:10.1186/s13063-022-06250-8), 2022-04-15

## 伦理委员会批准函

### Ethics Committee Approval Letter

审查编号 Approval No.: **B2021-579R**

|                                                                                                                                                                                                                                                                                                                                                                                                                                                                                                                                                                                                                                                                                         |                                                                                                                                                            |                                    |    |
|-----------------------------------------------------------------------------------------------------------------------------------------------------------------------------------------------------------------------------------------------------------------------------------------------------------------------------------------------------------------------------------------------------------------------------------------------------------------------------------------------------------------------------------------------------------------------------------------------------------------------------------------------------------------------------------------|------------------------------------------------------------------------------------------------------------------------------------------------------------|------------------------------------|----|
| <b>项目名称</b><br>Study Title                                                                                                                                                                                                                                                                                                                                                                                                                                                                                                                                                                                                                                                              | 非瓣膜性房颤社区 AI 辅助管理工具研发及推广效果研究                                                                                                                                |                                    |    |
| <b>试验产品名称</b><br>Study Product Name                                                                                                                                                                                                                                                                                                                                                                                                                                                                                                                                                                                                                                                     | 非瓣膜性房颤社区 AI 辅助管理工具                                                                                                                                         | <b>产品类别/规格</b><br>Product Category | NA |
| <b>批准文号及发文单位</b> (Approval No. and Issued By)<br>NA                                                                                                                                                                                                                                                                                                                                                                                                                                                                                                                                                                                                                                     |                                                                                                                                                            | <b>研究分期</b> (Phase of Study)<br>NA |    |
| <b>主要研究者</b> (Principal Investigator)<br>潘志刚                                                                                                                                                                                                                                                                                                                                                                                                                                                                                                                                                                                                                                            |                                                                                                                                                            | <b>申办者</b> (Sponsor)<br>复旦大学附属中山医院 |    |
| <b>审查方式及日期</b><br>(Type & Date of Review)                                                                                                                                                                                                                                                                                                                                                                                                                                                                                                                                                                                                                                               | <input checked="" type="checkbox"/> 会议审查 (Meeting Review) 2021 年 08 月 26 日<br><input checked="" type="checkbox"/> 快速审查 (Expedited Review) 2021 年 09 月 14 日 |                                    |    |
| <b>会议地点</b><br>(Meeting Location)                                                                                                                                                                                                                                                                                                                                                                                                                                                                                                                                                                                                                                                       | 复旦大学附属中山医院 5 号楼 211 会议室                                                                                                                                    |                                    |    |
| <b>会议出席情况</b><br>(Meeting Attendance)                                                                                                                                                                                                                                                                                                                                                                                                                                                                                                                                                                                                                                                   | 出席 (Attendance) <u>12</u> 人, 投票 (Vote) <u>12</u> 人, 回避 (Avoidance) <u>0</u> 人                                                                              |                                    |    |
| 下列研究相关文件已经批准<br>The following documents have been approved<br>见附件                                                                                                                                                                                                                                                                                                                                                                                                                                                                                                                                                                                                                       |                                                                                                                                                            |                                    |    |
| <b>审查决定</b> Decision for this proposal and have been [ <input checked="" type="checkbox"/> ]:<br><input checked="" type="checkbox"/> 同意 Approval<br>持续审查频率: <input type="checkbox"/> 3 个月/3 Months <input type="checkbox"/> 6 个月/6 Months <input checked="" type="checkbox"/> 1 年/1Year <input type="checkbox"/> 不适用/NA<br>批准函有效期至: 2022 年 09 月 14 日<br><br>主任委员/副主任委员签名 Chair/Vice Chair Signature: 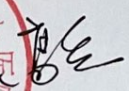<br>批准日期 Approval Date: <br>复旦大学附属中山医院伦理委员会(盖章)Stamp of ZSEC <span style="float: right;">2021.9.14</span> |                                                                                                                                                            |                                    |    |

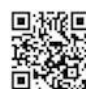



## 伦理委员会批准函

Ethics Committee Approval Letter

审查编号 Approval No.: B2021-579R

### 附件

| 序号  | 文件名称                          | 版本号/日期          |
|-----|-------------------------------|-----------------|
| 1.  | 研究方案                          | V1.1,2021-07-28 |
| 2.  | 知情同意书                         | V1.2,2021-09-01 |
| 3.  | 研究者简历                         | NA              |
| 4.  | 研究人员名单                        | NA              |
| 5.  | 患者满意度调查问卷简易版本 (PSQ-18)        | NA              |
| 6.  | Morisky 用药依从性问卷 (MMAS-8)      | NA              |
| 7.  | 社区全科医生对非瓣膜性房颤患者抗凝治疗的知-信-行调查问卷 | NA              |
| 8.  | 社区医生培训内容大纲                    | NA              |
| 9.  | 病例报告表                         | V1.0,2021-07-11 |
| 10. | 等级测评结论                        | NA              |
| 11. | 房颤临床辅助决策系统产品技术要求              | NA              |
| 12. | 房颤临床辅助决策系统测试报告                | V1.0            |
| 13. | 器械供应方资质                       | NA              |
| 14. | 受试者鉴认代码表                      | NA              |

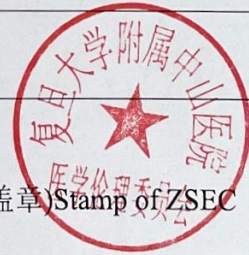

复旦大学附属中山医院伦理委员会(盖章) Stamp of ZSEC

联系方式: 上海市徐汇区枫林路 180 号    邮编: 200032    电话: 021-31587871    传真: 021-31587851

A-024    版本: 3.4

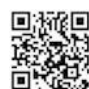



## 伦理委员会委员名单及出席情况

### Ethics Committee Composition and Attendant

会议编号: 2021年第08次会议

审查日期: Date of Review: 2021年08月26日

| 委员姓名和职称<br>Member Name and Title |                               | 从事专业<br>Profession                  | 性别<br>Gender | 工作单位<br>Working Place                 | 出席者签名<br>Signature of Attending                                                       |
|----------------------------------|-------------------------------|-------------------------------------|--------------|---------------------------------------|---------------------------------------------------------------------------------------|
| 姓名                               | 职称/职务                         |                                     |              |                                       |                                                                                       |
| 樊嘉**<br>Fan Jia                  | 教授<br>Professor               | 肝外科<br>Liver Surgery                | 男<br>Male    | 中山医院<br>Zhong Shan Hospital           |                                                                                       |
| 秦新裕*<br>Qin Xinyu                | 教授<br>Professor               | 普外科<br>General Surgery              | 男<br>Male    | 中山医院<br>Zhong Shan Hospital           |                                                                                       |
| 高鑫*<br>Gao Xin                   | 教授<br>Professor               | 内分泌<br>Endocrinology                | 女<br>Female  | 中山医院<br>Zhong Shan Hospital           | 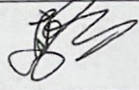   |
| 衡慧珠<br>Heng Huizhu               | 委员<br>Member                  | 社会学<br>Sociology                    | 女<br>Female  | 枫林街道<br>Fenglin Community             |    |
| 李雪宁<br>Li Xuening                | 主任药师<br>Chief Pharmacist      | 临床药理<br>Clinical Pharmacology       | 女<br>Female  | 中山医院<br>Zhong Shan Hospital           |    |
| 张博恒<br>Zhang Boheng              | 主任医师<br>Chief Physician       | 肝肿瘤内科<br>Hepatic Oncology           | 男<br>Male    | 中山医院<br>Zhong Shan Hospital           |                                                                                       |
| 孙元<br>Sun Yuan                   | 委员<br>Member                  | 律师<br>Lawyer                        | 男<br>Male    | 上海管博律师事务所<br>Shanghai Guanbo Law Firm |  |
| 李华茵<br>Li Huayin                 | 主任医师<br>Chief Physician       | 呼吸科<br>Respiratory Medicine         | 女<br>Female  | 中山医院<br>Zhong Shan Hospital           |  |
| 柏瑾<br>Bai Jin                    | 副主任医师<br>Vice Chief Physician | 心内科<br>Cardiology                   | 女<br>Female  | 中山医院<br>Zhong Shan Hospital           |  |
| 刘天舒<br>Liu Tianshu               | 主任医师<br>Chief Physician       | 肿瘤内科<br>Medical Oncology            | 女<br>Female  | 中山医院<br>Zhong Shan Hospital           |  |
| 姜红<br>Jiang Hong                 | 教授<br>Professor               | 心内科<br>Cardiology                   | 女<br>Female  | 中山医院<br>Zhong Shan Hospital           |  |
| 孙湛<br>Sun Zhan                   | 主任医师<br>Chief Physician       | 急诊<br>Emergency                     | 男<br>Male    | 中山医院<br>Zhong Shan Hospital           |  |
| 吴伟忠<br>Wu Weizhong               | 研究员<br>Professor              | 肝癌机制研究<br>Mechanism of Liver Cancer | 男<br>Male    | 中山医院<br>Zhong Shan Hospital           |  |
| 俞梅蓉<br>Yu Meirong                | 高级会计师<br>Senior Accountant    | 医院管理<br>Hospital Management         | 女<br>Female  | 中山医院<br>Zhong Shan Hospital           |  |
| 杨梦婕#<br>Yang Mengjie             | 助理研究员<br>Research Associate   | 伦理<br>Ethics Review                 | 女<br>Female  | 中山医院<br>Zhong Shan Hospital           |  |

注: \*\* 主任委员, \* 副主任委员, # 委员/秘书

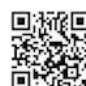



## 伦理委员会批准函

### Ethics Committee Approval Letter

审查编号 Approval No.: **B2021-579(2)**

|                                                                                                                                                                                                                                                                                             |                                                                                                                               |                                                                                      |       |
|---------------------------------------------------------------------------------------------------------------------------------------------------------------------------------------------------------------------------------------------------------------------------------------------|-------------------------------------------------------------------------------------------------------------------------------|--------------------------------------------------------------------------------------|-------|
| <b>项目名称</b><br>Study Title                                                                                                                                                                                                                                                                  | 非瓣膜性房颤社区 AI 辅助管理工具研发及推广效果研究                                                                                                   |                                                                                      |       |
| <b>试验产品名称</b><br>Study Product Name                                                                                                                                                                                                                                                         | 非瓣膜性房颤社区 AI 辅助管理工具                                                                                                            | <b>产品类别/规格</b><br>Product Category                                                   | PA100 |
| <b>批准文号及发文单位</b> (Approval No. and Issued By)<br>NA                                                                                                                                                                                                                                         | <b>研究分期</b> (Phase of Study)<br>NA                                                                                            |                                                                                      |       |
| <b>主要研究者</b> (Principal Investigator)<br>潘志刚                                                                                                                                                                                                                                                | <b>申办者</b> (Sponsor)<br>复旦大学附属中山医院                                                                                            |                                                                                      |       |
| <b>审查方式及日期</b><br>(Type & Date of Review)                                                                                                                                                                                                                                                   | <input type="checkbox"/> 会议审查 (Meeting Review)<br><input checked="" type="checkbox"/> 快速审查(Expedited Review) 2021 年 11 月 09 日 |                                                                                      |       |
| <b>会议地点</b><br>(Meeting Location)                                                                                                                                                                                                                                                           | NA                                                                                                                            |                                                                                      |       |
| <b>会议出席情况</b><br>(Meeting Attendance)                                                                                                                                                                                                                                                       | NA                                                                                                                            |                                                                                      |       |
| 下列研究相关文件已经批准<br>The following documents have been approved<br>1. 研究方案: V1.2, 2021-10-15<br>2. 知情同意书: V1.3, 2021-10-27                                                                                                                                                                       |                                                                                                                               |                                                                                      |       |
| <b>审查决定</b> Decision for this proposal and have been [√]:<br><br><input checked="" type="checkbox"/> 同意 Approval<br><br>持续审查频率: <input type="checkbox"/> 3 个月/3 Months <input type="checkbox"/> 6 个月/6 Months <input type="checkbox"/> 1 年/1Year <input checked="" type="checkbox"/> 不适用/NA |                                                                                                                               |                                                                                      |       |
| 主任委员/副主任委员签名 Chair/Vice Chair Signature:                                                                                                                                                                                                                                                    |                                                                                                                               | 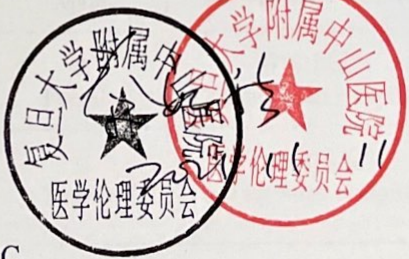 |       |
| 批准日期 Approval Date:                                                                                                                                                                                                                                                                         |                                                                                                                               |                                                                                      |       |
| 复旦大学附属中山医院伦理委员会(盖章)Stamp of ZSEC                                                                                                                                                                                                                                                            |                                                                                                                               |                                                                                      |       |

A-024 版本: 3.4

联系方式: 上海市徐汇区枫林路 180 号 邮编: 200032 电话: 021-31587871 传真: 021-31587851





**声明(Statement):**  
(请仔细阅读)

1. 复旦大学附属中山医院伦理委员会（以下简称本伦理委员会）的职责、人员组成、操作规范和记录遵循 ICH-GCP 及中华人民共和国国家药品监督管理局颁布的《药物临床试验质量管理规范》、《医疗器械临床试验质量管理规范》和《药物临床试验伦理审查工作指导原则》，并遵守中国相关法律和法规的规定。
2. **研究实施前提：**所有研究需经伦理委员会审查获得批准后方可实施，实施过程应遵循伦理委员会批准的方案执行，应符合赫尔辛基宣言和 GCP 的基本原则。**特殊情况：**(1)属《人类遗传资源采集、收集、买卖、出口、出境审批行政许可事项》规定范畴的研究，获得中国人类遗传资源管理工作办公室批准/备案后，将批准/备案成功结果书面递交伦理委员会备案后方可实施。(2)属《需进行临床试验审批的第三类医疗器械目录》内医疗器械的临床试验，获得国家药品监督管理局备案成功结果书面提交伦理委员会备案后方可实施。(3)属需在国家药品监督管理局备案/默示许可的项目，获得备案成功结果/默示许可的结果及时提交伦理委员会备案后方可实施。
3. 研究过程中，对研究方案和知情同意书等相关文件所作的任何修订，均需得到本伦理委员会审查同意后方可实施。
4. 在复旦大学附属中山医院发生的严重不良事件或可疑且非预期严重不良反应等安全性信息需按伦理委员要求及时递交，伦理委员会有权对其评估做出新的决定。
5. 方案违背和偏离需及时报告本伦理委员会。
6. 需按照伦理初始审查伦理批准函的持续审查频率和首次批准时间提交持续审查申请，确保批准函到期前 1 个月递交持续审查申请，以获得伦理委员会的批准。（本伦理委员会有权根据实际开展情况改变持续审查频率）
7. 暂停/提前终止临床试验，需及时书面向本伦理委员会提出申请。
8. 研究结束时，需及时向本伦理委员会递交结题报告及相关附件。
9. 本批准函可能在其他参加单位伦理委员会备案，如对审查结果有不同意见，请及时与本伦理委员会联系。

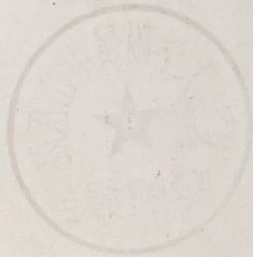



## 伦理委员会委员名单

### Ethics Committee Composition

| 委员姓名和职称<br>Member Name and Title |                               | 从事专业<br>Profession                  | 性别<br>Gender | 工作单位<br>Working Place                 |
|----------------------------------|-------------------------------|-------------------------------------|--------------|---------------------------------------|
| 姓名                               | 职称/职务                         |                                     |              |                                       |
| 樊嘉**<br>Fan Jia                  | 教授<br>Professor               | 肝外科<br>Liver Surgery                | 男<br>Male    | 中山医院<br>Zhong Shan Hospital           |
| 秦新裕*<br>Qin Xinyu                | 教授<br>Professor               | 普外科<br>General Surgery              | 男<br>Male    | 中山医院<br>Zhong Shan Hospital           |
| 高鑫*<br>Gao xin                   | 教授<br>Professor               | 内分泌<br>Endocrinology                | 女<br>Female  | 中山医院<br>Zhong Shan Hospital           |
| 衡慧珠<br>Heng Huizhu               | 委员<br>Member                  | 社会学<br>Sociology                    | 女<br>Female  | 枫林街道<br>Fenglin Community             |
| 李雪宁<br>Li Xuening                | 主任药师<br>Chief Pharmacist      | 临床药理<br>Clinical Pharmacology       | 女<br>Female  | 中山医院<br>Zhong Shan Hospital           |
| 张博恒<br>Zhang Boheng              | 主任医师<br>Chief Physician       | 肝肿瘤内科 Hepatic Oncology              | 男<br>Male    | 中山医院<br>Zhong Shan Hospital           |
| 孙元<br>Sun Yuan                   | 委员<br>Member                  | 律师<br>Lawyer                        | 男<br>Male    | 上海管博律师事务所<br>Shanghai Guanbo Law Firm |
| 李华茵<br>Li Huayin                 | 主任医师<br>Chief Physician       | 呼吸科<br>Respiratory Medicine         | 女<br>Female  | 中山医院<br>Zhong Shan Hospital           |
| 柏瑾<br>Bai Jin                    | 副主任医师<br>Vice Chief Physician | 心内科<br>Cardiology                   | 女<br>Female  | 中山医院<br>Zhong Shan Hospital           |
| 刘天舒<br>Liu Tianshu               | 主任医师<br>Chief Physician       | 肿瘤内科<br>Medical Oncology            | 女<br>Female  | 中山医院<br>Zhong Shan Hospital           |
| 姜红<br>Jiang Hong                 | 教授<br>Professor               | 心内科<br>Cardiology                   | 女<br>Female  | 中山医院<br>Zhong Shan Hospital           |
| 孙湛<br>Sun Zhan                   | 副主任医师<br>Vice Chief Physician | 急诊<br>Emergency                     | 男<br>Male    | 中山医院<br>Zhong Shan Hospital           |
| 吴伟忠<br>Wu Weizhong               | 研究员<br>Professor              | 肝癌机制研究<br>Mechanism of Liver Cancer | 男<br>Male    | 中山医院<br>Zhong Shan Hospital           |
| 俞梅蓉<br>Yu Meirong                | 高级会计师<br>Senior Accountant    | 医院管理<br>Hospital Management         | 女<br>Female  | 中山医院<br>Zhong Shan Hospital           |
| 杨梦婕#<br>Yang Mengjie             | 助理研究员<br>Research Associate   | 伦理<br>Ethics Review                 | 女<br>Female  | 中山医院<br>Zhong Shan Hospital           |

注: \*\* 主任委员, \* 副主任委员, # 委员/秘书



Supplement: MOESM5 [file 20315726]
