# Supplementary material for: Effect of an artificial intelligence-assisted tool on non-valvular atrial fibrillation anticoagulation management in primary care: protocol for a cluster randomized controlled trial
Source: Springer Nature journal article supplement (doi:10.1186/s13063-022-06250-8), 2022-04-15
Supplement: MOESM1 [file 20315726]

**Table 1 | SPIRIT-AI checklist**

| Section                                           | Item | SPIRIT 2013 item <sup>a</sup>                                                                                                                                                                                                                                                            | SPIRIT-AI item                  |                                                                                                                                                                                                 | Addressed on page number <sup>b</sup> |
|---------------------------------------------------|------|------------------------------------------------------------------------------------------------------------------------------------------------------------------------------------------------------------------------------------------------------------------------------------------|---------------------------------|-------------------------------------------------------------------------------------------------------------------------------------------------------------------------------------------------|---------------------------------------|
| Administrative information                        |      |                                                                                                                                                                                                                                                                                          |                                 |                                                                                                                                                                                                 |                                       |
| <b>Title</b>                                      | 1    | Descriptive title identifying the study design, population, interventions, and, if applicable, trial acronym                                                                                                                                                                             | SPIRIT-AI 1 (i)<br>Elaboration  | Indicate that the intervention involves artificial intelligence/machine learning and specify the type of model.                                                                                 | Page 1                                |
|                                                   |      |                                                                                                                                                                                                                                                                                          | SPIRIT-AI 1 (ii)<br>Elaboration | Specify the intended use of the AI intervention.                                                                                                                                                | Page 1                                |
| <b>Trial registration</b>                         | 2a   | Trial identifier and registry name. If not yet registered, name of intended registry                                                                                                                                                                                                     |                                 |                                                                                                                                                                                                 | Page 4&8                              |
|                                                   | 2b   | All items from the World Health Organization Trial Registration Dataset                                                                                                                                                                                                                  |                                 |                                                                                                                                                                                                 | Throughout the paper, pages 1-35      |
| <b>Protocol version</b>                           | 3    | Date and version identifier                                                                                                                                                                                                                                                              |                                 |                                                                                                                                                                                                 | Page 24                               |
| <b>Funding</b>                                    | 4    | Sources and types of financial, material, and other support                                                                                                                                                                                                                              |                                 |                                                                                                                                                                                                 | Page 27                               |
| <b>Roles and responsibilities</b>                 | 5a   | Names, affiliations, and roles of protocol contributors                                                                                                                                                                                                                                  |                                 |                                                                                                                                                                                                 | Page 1,2&27                           |
|                                                   | 5b   | Name and contact information for the trial sponsor                                                                                                                                                                                                                                       |                                 |                                                                                                                                                                                                 | Page 2                                |
|                                                   | 5c   | Role of study sponsor and funders, if any, in study design; collection, management, analysis, and interpretation of data; writing of the report; and the decision to submit the report for publication, including whether they will have ultimate authority over any of these activities |                                 |                                                                                                                                                                                                 | Page 27                               |
|                                                   | 5d   | Composition, roles, and responsibilities of the coordinating center, steering committee, endpoint adjudication committee, data management team, and other individuals or groups overseeing the trial, if applicable (see Item 21a for data monitoring committee)                         |                                 |                                                                                                                                                                                                 | Page 18                               |
| Introduction                                      |      |                                                                                                                                                                                                                                                                                          |                                 |                                                                                                                                                                                                 |                                       |
| <b>Background and rationale</b>                   | 6a   | Description of research question and justification for undertaking the trial, including summary of relevant studies (published and unpublished) examining benefits and harms for each intervention                                                                                       | SPIRIT-AI 6a (i)<br>Extension   | Explain the intended use of the AI intervention in the context of the clinical pathway, including its purpose and its intended users (for example, healthcare professionals, patients, public). | Page 6-8                              |
|                                                   |      |                                                                                                                                                                                                                                                                                          | SPIRIT-AI 6a (ii)<br>Extension  | Describe any pre-existing evidence for the AI intervention.                                                                                                                                     | Page 6-8                              |
|                                                   | 6b   | Explanation for choice of comparators                                                                                                                                                                                                                                                    |                                 |                                                                                                                                                                                                 | Page 6-8                              |
| <b>Objectives</b>                                 | 7    | Specific objectives or hypotheses                                                                                                                                                                                                                                                        |                                 |                                                                                                                                                                                                 | Page 8                                |
| <b>Trial design</b>                               | 8    | Description of trial design including type of trial (for example, parallel group, crossover, factorial, single group), allocation ratio, and framework (for example, superiority, equivalence, noninferiority, exploratory)                                                              |                                 |                                                                                                                                                                                                 | Page 8                                |
| Methods: participants, interventions and outcomes |      |                                                                                                                                                                                                                                                                                          |                                 |                                                                                                                                                                                                 |                                       |
| <b>Study setting</b>                              | 9    | Description of study settings (for example, community clinic, academic hospital) and list of countries where data will be collected. Reference to where list of study sites can be obtained                                                                                              | SPIRIT-AI 9<br>Extension        | Describe the onsite and offsite requirements needed to integrate the AI intervention into the trial setting.                                                                                    | Page 9 & Appendix 2                   |
| <b>Eligibility criteria</b>                       | 10   | Inclusion and exclusion criteria for participants. If applicable, eligibility criteria for study centers and individuals who will perform the interventions (for example, surgeons, psychotherapists)                                                                                    | SPIRIT-AI 10 (i)<br>Elaboration | State the inclusion and exclusion criteria at the level of participants.                                                                                                                        | Page 9-10 &                           |
|                                                   |      |                                                                                                                                                                                                                                                                                          | SPIRIT-AI 10 (ii)<br>Extension  | State the inclusion and exclusion criteria at the level of the input data.                                                                                                                      | Page 11-15                            |

Continued

**Table 1 | SPIRIT-AI checklist (Continued)**

| Section                                                      | Item                                                                                                                                                       | SPIRIT 2013 item <sup>a</sup>                                                                                                                                                                                                                                                                                                                                                                             | SPIRIT-AI item                | Addressed on page number <sup>b</sup>                                                                                                 |                |
|--------------------------------------------------------------|------------------------------------------------------------------------------------------------------------------------------------------------------------|-----------------------------------------------------------------------------------------------------------------------------------------------------------------------------------------------------------------------------------------------------------------------------------------------------------------------------------------------------------------------------------------------------------|-------------------------------|---------------------------------------------------------------------------------------------------------------------------------------|----------------|
| Interventions                                                | 11a                                                                                                                                                        | Interventions for each group with sufficient detail to allow replication, including how and when they will be administered                                                                                                                                                                                                                                                                                | SPIRIT-AI 11a (i) Extension   | State which version of the AI algorithm will be used.                                                                                 | Page 7-8&11-12 |
|                                                              |                                                                                                                                                            |                                                                                                                                                                                                                                                                                                                                                                                                           | SPIRIT-AI 11a (ii) Extension  | Specify the procedure for acquiring and selecting the input data for the AI intervention.                                             | Page 11-15     |
|                                                              |                                                                                                                                                            |                                                                                                                                                                                                                                                                                                                                                                                                           | SPIRIT-AI 11a (iii) Extension | Specify the procedure for assessing and handling poor-quality or unavailable input data.                                              | Page 13-14     |
|                                                              |                                                                                                                                                            |                                                                                                                                                                                                                                                                                                                                                                                                           | SPIRIT-AI 11a (iv) Extension  | Specify whether there is human-AI interaction in the handling of the input data, and what level of expertise is required for users.   | Page 12        |
|                                                              |                                                                                                                                                            |                                                                                                                                                                                                                                                                                                                                                                                                           | SPIRIT-AI 11a (v) Extension   | Specify the output of the AI intervention.                                                                                            | Page 11&15     |
|                                                              |                                                                                                                                                            |                                                                                                                                                                                                                                                                                                                                                                                                           | SPIRIT-AI 11a (vi) Extension  | Explain the procedure for how the AI intervention's output will contribute to decision-making or other elements of clinical practice. | Page 12        |
|                                                              | 11b                                                                                                                                                        | Criteria for discontinuing or modifying allocated interventions for a given trial participant (for example, drug dose change in response to harms, participant request, or improving/worsening disease)                                                                                                                                                                                                   |                               |                                                                                                                                       | Page 19        |
| 11c                                                          | Strategies to improve adherence to intervention protocols, and any procedures for monitoring adherence (for example, drug tablet return, laboratory tests) |                                                                                                                                                                                                                                                                                                                                                                                                           |                               | Page 18                                                                                                                               |                |
| 11d                                                          | Relevant concomitant care and interventions that are permitted or prohibited during the trial                                                              |                                                                                                                                                                                                                                                                                                                                                                                                           |                               | Page 10                                                                                                                               |                |
| Outcomes                                                     | 12                                                                                                                                                         | Primary, secondary, and other outcomes, including the specific measurement variable (for example, systolic blood pressure), analysis metric (for example, change from baseline, final value, time to event), method of aggregation (for example, median, proportion), and time point for each outcome. Explanation of the clinical relevance of chosen efficacy and harm outcomes is strongly recommended |                               | Page 15-17& 20-21                                                                                                                     |                |
| Participant timeline                                         | 13                                                                                                                                                         | Time schedule of enrollment, interventions (including any run-ins and washouts), assessments, and visits for participants. A schematic diagram is highly recommended (Fig. 1)                                                                                                                                                                                                                             |                               | Page 24& figure4&5                                                                                                                    |                |
| Sample size                                                  | 14                                                                                                                                                         | Estimated number of participants needed to achieve study objectives and how it was determined, including clinical and statistical assumptions supporting any sample size calculations                                                                                                                                                                                                                     |                               | Page 19-20                                                                                                                            |                |
| Recruitment                                                  | 15                                                                                                                                                         | Strategies for achieving adequate participant enrollment to reach target sample size                                                                                                                                                                                                                                                                                                                      |                               | Page 17                                                                                                                               |                |
| Methods: assignment of interventions (for controlled trials) |                                                                                                                                                            |                                                                                                                                                                                                                                                                                                                                                                                                           |                               |                                                                                                                                       |                |
| Sequence generation                                          | 16a                                                                                                                                                        | Method of generating the allocation sequence (for example, computer-generated random numbers), and list of any factors for stratification. To reduce predictability of a random sequence, details of any planned restriction (for example, blocking) should be provided in a separate document that is unavailable to those who enroll participants or assign interventions                               |                               | Page 10-11                                                                                                                            |                |

Continued

**Table 1 | SPIRIT-AI checklist (Continued)**

| Section                                           | Item                  | SPIRIT 2013 item <sup>a</sup>                                                                                                                                                                                                                                                                                                                                                                                                  | SPIRIT-AI item                                                                                                             | Addressed on page number <sup>b</sup> |
|---------------------------------------------------|-----------------------|--------------------------------------------------------------------------------------------------------------------------------------------------------------------------------------------------------------------------------------------------------------------------------------------------------------------------------------------------------------------------------------------------------------------------------|----------------------------------------------------------------------------------------------------------------------------|---------------------------------------|
| <b>Allocation concealment mechanism</b>           | 16b                   | Mechanism of implementing the allocation sequence (for example, central telephone; sequentially numbered, opaque, sealed envelopes), describing any steps to conceal the sequence until interventions are assigned                                                                                                                                                                                                             |                                                                                                                            | Page 11                               |
|                                                   | <b>Implementation</b> | 16c                                                                                                                                                                                                                                                                                                                                                                                                                            | Who will generate the allocation sequence, who will enroll participants, and who will assign participants to interventions | Page 9&10 &17-18                      |
| <b>Blinding (masking)</b>                         | 17a                   | Who will be blinded after assignment to interventions (for example, trial participants, care providers, outcome assessors, data analysts), and how                                                                                                                                                                                                                                                                             |                                                                                                                            | Page 11                               |
|                                                   | 17b                   | If blinded, circumstances under which unblinding is permissible, and procedure for revealing a participant's allocated intervention during the trial                                                                                                                                                                                                                                                                           |                                                                                                                            | Not applicable                        |
| Methods: data collection, management and analysis |                       |                                                                                                                                                                                                                                                                                                                                                                                                                                |                                                                                                                            |                                       |
| <b>Data collection methods</b>                    | 18a                   | Plans for assessment and collection of outcome, baseline, and other trial data, including any related processes to promote data quality (for example, duplicate measurements, training of assessors) and a description of study instruments (for example, questionnaires, laboratory tests) along with their reliability and validity, if known. Reference to where data collection forms can be found, if not in the protocol |                                                                                                                            | Page 16-17 &18-19                     |
|                                                   | 18b                   | Plans to promote participant retention and complete follow-up, including list of any outcome data to be collected for participants who discontinue or deviate from intervention protocols                                                                                                                                                                                                                                      |                                                                                                                            | Page 9-10&18                          |
| <b>Data management</b>                            | 19                    | Plans for data entry, coding, security, and storage, including any related processes to promote data quality (for example, double data entry; range checks for data values). Reference to where details of data management procedures can be found, if not in the protocol                                                                                                                                                     |                                                                                                                            | Page 18                               |
| <b>Statistical methods</b>                        | 20a                   | Statistical methods for analyzing primary and secondary outcomes. Reference to where other details of the statistical analysis plan can be found, if not in the protocol                                                                                                                                                                                                                                                       |                                                                                                                            | Page 20-21                            |
|                                                   | 20b                   | Methods for any additional analyses (for example, subgroup and adjusted analyses)                                                                                                                                                                                                                                                                                                                                              |                                                                                                                            | Page 20-21                            |
|                                                   | 20c                   | Definition of analysis population relating to protocol non-adherence (for example, as randomized analysis), and any statistical methods to handle missing data (for example, multiple imputation)                                                                                                                                                                                                                              |                                                                                                                            | Page 20                               |
| Methods: monitoring                               |                       |                                                                                                                                                                                                                                                                                                                                                                                                                                |                                                                                                                            |                                       |
| <b>Data monitoring</b>                            | 21a                   | Composition of data monitoring committee (DMC); summary of its role and reporting structure; statement of whether it is independent from the sponsor and competing interests; and reference to where further details about its charter can be found, if not in the protocol. Alternatively, an explanation of why a DMC is not needed                                                                                          |                                                                                                                            | Page 19                               |
|                                                   | 21b                   | Description of any interim analyses and stopping guidelines, including who will have access to these interim results and make the final decision to terminate the trial                                                                                                                                                                                                                                                        |                                                                                                                            | Page 19                               |

Continued

**Table 1 | SPIRIT-AI checklist (Continued)**

| Section                              | Item | SPIRIT 2013 item <sup>a</sup>                                                                                                                                                                                                                                                                | SPIRIT-AI item         | Addressed on page number <sup>b</sup>                                                                                                 |
|--------------------------------------|------|----------------------------------------------------------------------------------------------------------------------------------------------------------------------------------------------------------------------------------------------------------------------------------------------|------------------------|---------------------------------------------------------------------------------------------------------------------------------------|
| <b>Harms</b>                         | 22   | Plans for collecting, assessing, reporting, and managing solicited and spontaneously reported adverse events and other unintended effects of trial interventions or trial conduct                                                                                                            | SPIRIT-AI 22 Extension | Specify any plans to identify and analyze performance errors. If there are no plans for this, justify why not.<br>Page 19             |
| <b>Auditing</b>                      | 23   | Frequency and procedures for auditing trial conduct, if any, and whether the process will be independent from investigators and the sponsor                                                                                                                                                  |                        | Page 18                                                                                                                               |
| Ethics and dissemination             |      |                                                                                                                                                                                                                                                                                              |                        |                                                                                                                                       |
| <b>Research ethics approval</b>      | 24   | Plans for seeking research ethics committee/institutional review board (REC/IRB) approval                                                                                                                                                                                                    |                        | Page 8&25                                                                                                                             |
| <b>Protocol amendments</b>           | 25   | Plans for communicating important protocol modifications (for example, changes to eligibility criteria, outcomes, analyses) to relevant parties (for example, investigators, REC/IRBs, trial participants, trial registries, journals, regulators)                                           |                        | Page 25                                                                                                                               |
| <b>Consent or ascent</b>             | 26a  | Who will obtain informed consent or assent from potential trial participants or authorized surrogates, and how (see Item 32)                                                                                                                                                                 |                        | Page 17&25                                                                                                                            |
|                                      | 26b  | Additional consent provisions for collection and use of participant data and biological specimens in ancillary studies, if applicable                                                                                                                                                        |                        | Not applicable                                                                                                                        |
| <b>Confidentiality</b>               | 27   | How personal information about potential and enrolled participants will be collected, shared, and maintained in order to protect confidentiality before, during, and after the trial                                                                                                         |                        | Page 19&26                                                                                                                            |
| <b>Declaration of interests</b>      | 28   | Financial and other competing interests for principal investigators for the overall trial and each study site                                                                                                                                                                                |                        | Page 26-27                                                                                                                            |
| <b>Access to data</b>                | 29   | Statement of who will have access to the final trial dataset, and disclosure of contractual agreements that limit such access for investigators                                                                                                                                              | SPIRIT-AI 29 Extension | State whether and how the AI intervention and/or its code can be accessed, including any restrictions to access or re-use.<br>Page 19 |
| <b>Ancillary and post-trial care</b> | 30   | Provisions, if any, for ancillary and post-trial care, and for compensation to those who suffer harm from trial participation                                                                                                                                                                |                        | Page 19&25-26                                                                                                                         |
| <b>Dissemination policy</b>          | 31a  | Plans for investigators and sponsor to communicate trial results to participants, healthcare professionals, the public, and other relevant groups (for example, via publication, reporting in results databases, or other data sharing arrangements), including any publication restrictions |                        | Page 26                                                                                                                               |
|                                      | 31b  | Authorship eligibility guidelines and any intended use of professional writers                                                                                                                                                                                                               |                        | Page 26                                                                                                                               |
|                                      | 31c  | Plans, if any, for granting public access to the full protocol, participant-level dataset, and statistical code                                                                                                                                                                              |                        | Page 26                                                                                                                               |
| Appendices                           |      |                                                                                                                                                                                                                                                                                              |                        |                                                                                                                                       |
| <b>Informed consent materials</b>    | 32   | Model consent form and other related documentation given to participants and authorized surrogates                                                                                                                                                                                           |                        | Appendix 3                                                                                                                            |
| <b>Biological specimens</b>          | 33   | Plans for collection, laboratory evaluation, and storage of biological specimens for genetic or molecular analysis in the current trial and for future use in ancillary studies, if applicable                                                                                               |                        | Not applicable                                                                                                                        |

<sup>a</sup>It is strongly recommended that this checklist be read in conjunction with the SPIRIT 2013 Explanation & Elaboration for important clarification on the items. <sup>b</sup>Indicates page numbers to be completed by authors during protocol development.
