# Supplementary material for: Effect of an artificial intelligence-assisted tool on non-valvular atrial fibrillation anticoagulation management in primary care: protocol for a cluster randomized controlled trial
Source: Springer Nature journal article supplement (doi:10.1186/s13063-022-06250-8), 2022-04-15
Supplement: MOESM3 [file 20315726]

## Appendix 2

### ICD-10 codes

1. I48.200: chronic atrial fibrillation;
2. I48.100: persistent atrial fibrillation;
3. I48.900x015: first diagnosed atrial fibrillation;
4. I48.100x002: permanent atrial fibrillation;
5. I48.000: paroxysmal atrial flutter;
6. I48.100x003: long-standing persistent atrial fibrillation;
7. I48.900x004: atrial fibrillation;
8. I48.900: atrial fibrillation or atrial flutter;
9. I48.900x003: atrial flutter;
10. I48.300: typical atrial flutter;
11. I48.301: type I atrial flutter;
12. I48.400: atypical atrial flutter;
13. I48.401: type II atrial flutter;
