# Supplementary material for: Effect of an artificial intelligence-assisted tool on non-valvular atrial fibrillation anticoagulation management in primary care: protocol for a cluster randomized controlled trial
Source: Springer Nature journal article supplement (doi:10.1186/s13063-022-06250-8), 2022-04-15
Supplement: MOESM6 [file 20315726]

上海市卫生健康委  
先进适宜技术推广项目

Shanghai Municipal Health Commission  
the Advanced and Appropriate Technology Promotion Project

计划任务书

Planning assignment

Project ID  
项目编号: 2019SY009

Project title Development and promotion of an AI-assisted tool for NVAF management in primary care  
项目名称: 非瓣膜性房颤社区AI辅助管理工具研发及推广效果研究

Project undertaking unit (seal) Zhongshan Hospital, Fudan University  
项目承担单位(盖章): 复旦大学附属中山医院

Director Zhigang Pan  
项目负责人: 潘志刚

联合单位(盖章): \_\_\_\_\_

Time limit From July 2019 to June 2022  
项目年限: 2019 年 7 月至 2022 年 6 月

Application Date April 30th 2019  
填报日期: 2019 年 4 月 30 日

Telephone  
联系电话: 18616881251

Email  
电子邮箱: zhigang\_pan@163.com

上海市卫生健康委

二〇一九年

Shanghai Municipal Health Commission  
2019

## 八、审核意见 Review Opinions

### 项目责任单位意见 Opinions of the undertaking unit

本单位将按本任务书中所填报内容完成各项任务，并承诺保证所需人力、物力等各项保障。  
We promised to complete the assignments in the application documents, and guarantee the necessary manpower and equipments.

法定代表人签字:

Signature of the legal representative

单位盖章  
Seal of the undertaking unit

二〇一九年十月十二日  
October 12nd, 2019

### 上级主管部门意见 Opinions of the superior authority

同意上报 Approval

Seal 单位盖章:

二〇一九年十月十二日  
October 12nd, 2019

### 上海市卫生健康委意见

Opinions of Shanghai Municipal Health Commission

单位盖章:  
Seal

二〇 年 月 日
